# Supplementary material
Source: PubMed Central journal article supplement (PMC3033312)
Supplement: 1014775108_pnas.201014775SI.pdf [file 1014775108_pnas.201014775SI.pdf]

# Supporting Information

Das et al. 10.1073/pnas.1014775108

## SI Materials and Methods

**Bacterial and Cell Culture.** For bacterial culture, a single colony was inoculated into LB broth and grown for 8 h under aerobic conditions and then under oxygen-limiting conditions overnight. Under these conditions, bacteria correspond to  $5$  to  $7 \times 10^8$  cfu/mL. Cells were infected at an MOI of 10 unless otherwise indicated. J774 cells and BAI1-overexpressing J774 cells were maintained in high-glucose DMEM containing 10% FCS, 2 mM L-glutamine, 1 mM sodium pyruvate, 4.5 g/L glucose, and antibiotics in a 5% CO<sub>2</sub> incubator at 37 °C. Cells were transfected using Lipofectamine 2000 (Invitrogen) as described previously (1).

**PCR Primers.** BAI1 and ELMO1 mRNA was amplified by using the primers BAI1-F 5' aagttcttcggctacttctcg 3' and BAI1-R 5' cgggattccactcctggcattgctgca 3'; ELMO1-F 5' cgtgaagtgccatagaat 3' and ELMO1-R 5' tcccctgaagatgaggaatg 3'.

**Preparation of Recombinant RGD-TSR.** The RGD-TSR region of BAI1 was subcloned into the vector pGEX-4T2, generating a fusion protein with an N-terminal GST tag. The plasmid was transformed into Arctic Express competent cells (DE3; Stratagene). Induction of protein was done with 1 mM IPTG for 24 h at 10 °C according to the manufacturer's instructions. Purified RGD-TSR was prepared in large scale by the Protein Biosynthesis and Biomarker Core Laboratory at the University of Texas Medical Branch (Galveston, TX).

**Assessment of Rac1 Activation.** Rac1 activity was assayed by pull-down assay. Infected cells were lysed in buffer containing 50 mM Tris-HCl (pH 7.5), 2 mM MgCl<sub>2</sub>, 0.1 M NaCl, 1% Nonidet P-40, and 10% glycerol with protease inhibitors and incubated with GST coupled to the p21-binding domain of Pak to precipitate Rac-GTP. Blots were visualized using Pierce SuperSignal ECL reagents. The ratio of active Rac1 (GTP bound) to total Rac1 was quantified by using ImageQuant 5.2 (Molecular Dynamics).

**BMDM Preparation.** Marrow was flushed from mouse leg bones with medium (RPMI plus 10% FCS supplemented with 2 mM glutamine, 1 mM sodium pyruvate) and seeded onto Petri dishes. For growth of bone marrow macrophages, RPMI medium was supplemented with 20% of supernatant taken from L929 cells (containing murine granulocyte-macrophage colony stimulating factor, referred to as BMDM medium).

**Gentamicin Protection Assay.** Approximately  $2 \times 10^5$  cells per well were seeded into 24-well culture dishes 18 h before infection at an MOI of 10 for 1 h in antibiotic-free DMEM in a 37 °C CO<sub>2</sub> incubator. Cells were then washed and incubated with gentamicin (500 µg/mL) for 90 min to kill extracellular bacteria. Subsequently, cells were lysed in 1% Triton-X 100, and lysates were serially diluted and plated directly onto LB agar plates. Total cfu values were enumerated the next day after overnight incubation at 37 °C. Values were standardized to levels of colonization in control cell preparations.

**Preparation of Intestinal Macrophages.** Gut antigen-presenting cells were isolated by using techniques described previously (2, 3). Briefly, small intestines were removed from C57BL/6 mice, opened longitudinally to flush out feces, cut into 15-mm pieces, and then incubated for 20 min at 37 °C on a shaker in HBSS supplemented with 5% heat-inactivated FBS and 2 mM EDTA. After passing the preparation through a metal filter, intestinal fragments were collected and the step was repeated. Subsequently, intestinal fragments were minced and incubated for 20 min at 37 °C on a shaker in HBSS supplemented with 5% heat-inactivated FBS and 1 mg/mL type VIII collagenase (Sigma-Aldrich). The cell suspension was passed through a cell strainer to remove debris and washed, and then CD11b<sup>+</sup> cells were enriched with a CD11b MACS kit (Miltenyi Biotec). From this enriched population, CD11b<sup>+</sup> intestinal macrophages were then sorted using a FACSVantage cell sorter (BD Biosciences).

1. Park D, et al. (2007) BAI1 is an engulfment receptor for apoptotic cells upstream of the ELMO/Dock180/Rac module. *Nature* 450:430–434.
2. Wilson JM, et al. (2009) The A<sub>2B</sub> adenosine receptor impairs the maturation and immunogenicity of dendritic cells. *J Immunol* 182:4616–4623.

3. Denning TL, Wang YC, Patel SR, Williams IR, Pulendran B (2007) Lamina propria macrophages and dendritic cells differentially induce regulatory and interleukin 17-producing T cell responses. *Nat Immunol* 8:1086–1094.

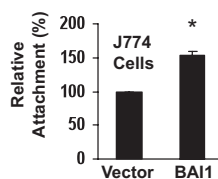

**Fig. S1.** Relative attachment of bacteria to control J774 cells (vector) or cells overexpressing BAI1. Bacterial counts were normalized to vector controls and represented as the mean ( $\pm$ SD) from three independent experiments (\* $P \leq 0.05$ ).

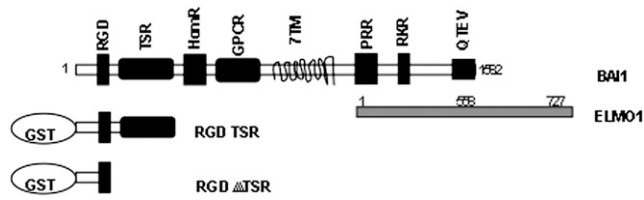

**Fig. S2.** Schematic representation of BAI1 domains. (RGD, putative integrin binding motif; TSR, five TSRs; HomR, hormone receptor homology; GPCR, GPCR cleavage site; 7TM, seven transmembrane domains; PRR, proline rich region; RKR, ELMO binding site; QTEV, PDZ motif.) The RGD TSR construct contains an N-terminal GST tag, and includes the RGD motif and all five TSRs. Inclusion of the RGD is necessary to maintain solubility of the recombinant protein. The RGD $\Delta$ TSR construct contains N-terminal GST and the RGD motif, but lacks the TSRs.

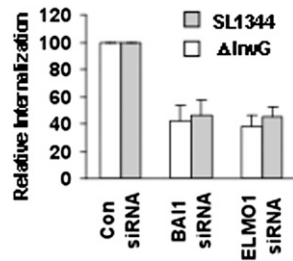

**Fig. S3.** Knockdown of BAI1 or ELMO1 inhibits internalization of both invasive (SL1344) and noninvasive ( $\Delta$ InvG) *Salmonella* Typhimurium. Bacterial internalization by BMDMs was assayed using the gentamicin protection assay. Data represent the mean  $\pm$  SD of two replicates from three independent experiments.

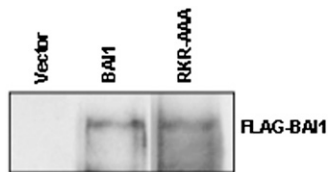

**Fig. S4.** Documentation of BAI1 expression levels in transfected CHO cells. Cells were transfected with vector control, full-length FLAG-BAI1, or FLAG-BAI1 with a mutation in the cytoplasmic ELMO-binding motif (RKR-AAA). Immunoblot with anti-FLAG antibody demonstrates equivalent levels of expression of two constructs.

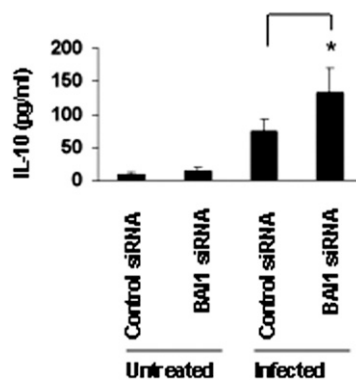

**Fig. S5.** Knockdown of BAI1 enhances IL-10 responses. IL-10 production was measured by ELISA in supernatants collected from control and BAI1-depleted BMDMs after 6 h of incubation with *Salmonella* Typhimurium ( $\Delta$ InvG). Data represent the mean  $\pm$  SD of duplicate wells for each condition from three independent experiments (\* $P \leq 0.05$ ).

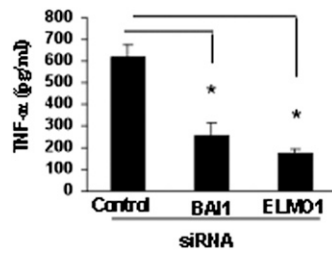

Fig. S6. Knockdown of BAI1 or ELMO1 inhibits TNF- $\alpha$  production induced by *S. typhimurium*. TNF- $\alpha$  secretion was measured by ELISA after infection of BMDM for 6 h.

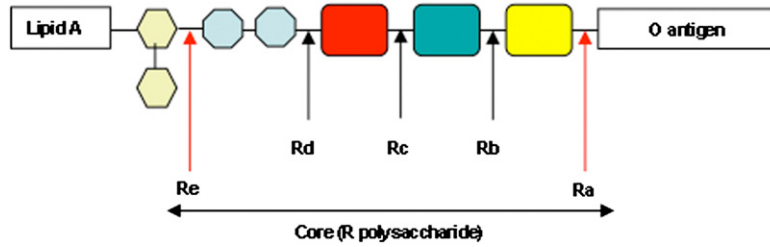

Fig. S7. LPS structure can be divided into three regions; the lipid A portion, the inner core (R polysaccharide), and the O-antigen. The core oligosaccharide can contain different lengths of oligosaccharide that attach to the lipid A as shown in the schematic. So-called rough strains (based on colony morphology) produce lipid A with variable amounts of core oligosaccharide, ranging from six (Ra) to none (Re), whereas "smooth" strains make LPS containing all the core oligosaccharides plus O-antigen.
